# Supplementary material for: Marginal Abatement Cost Curves for Water Scarcity Mitigation under Uncertainty
Source: Springer Nature journal article supplement (doi:10.1007/s11269-019-02376-8), 2019-09-01
Supplement: MOESM2 [file 17338850]

## Marginal abatement cost curves for water scarcity mitigation under uncertainty

Karin Sjöstrand<sup>1,2,\*</sup>, Andreas Lindhe<sup>2</sup>, Tore Söderqvist<sup>3</sup>, Peter Dahlqvist<sup>4</sup>, Lars Rosén<sup>2</sup>

<sup>1</sup>RISE Research Institutes of Sweden, Scheelevägen 27, SE- 223 70 Lund, Sweden.

\*Corresponding author, email: karin.sjostrand@ri.se

<sup>2</sup>Chalmers University of Technology, Department of Architecture and Civil Engineering, SE-412 96 Göteborg, Sweden

<sup>3</sup>Anthesis Enveco, Barnhusgatan 4, SE-111 23 Stockholm, Sweden

<sup>4</sup>Geological Survey of Sweden, Kiliansgatan 10, SE-223 50 Lund, Sweden

**Table 1** Estimates and assumptions for the Gotland cost curve assessment, distributions used are Log-normal LN ( $\mu,\sigma$ ) and Normal N ( $\mu,\sigma$ )

| Mitigation measure | Input variable            | Unit                      | Estimate      | Assumptions and references                                                                                                                                                                                                                                                                  |
|--------------------|---------------------------|---------------------------|---------------|---------------------------------------------------------------------------------------------------------------------------------------------------------------------------------------------------------------------------------------------------------------------------------------------|
| Leakage detection  | Potential                 | 1000 m <sup>3</sup> /year | LN (74,20)    | Based on information on annual leakage losses (VASS, 2018) and a calculated infrastructure leakage index (ILI) (Lambert et al., 1999) for Gotland of 1.2, the theoretical potential of leakage reduction was calculated as the annual real losses minus the unavoidable annual real losses. |
|                    | Flow meters               | kSEK/instrument           | LN (145,20)   | Cost estimates were based on Malm et al. (2015). A total of 63 district flow meters were assumed to be needed on Gotland. Useful life was set to 20 years.                                                                                                                                  |
|                    | Drinking water production | SEK/m <sup>3</sup>        | LN (3.29,0.4) | Cost reduction due to lower drinking water production. Cost estimates were based on VASS (2015).                                                                                                                                                                                            |
|                    | Wastewater treatment      | SEK/m <sup>3</sup>        | LN (3.54,0.4) | Lower costs for wastewater treatment due to less leakage from drinking water pipes entering wastewater pipes. 50% of the leakage was assumed to enter the wastewater pipes (Malm et al., 2015). Cost estimates were based on VASS (2018).                                                   |
| Desalination       | Potential                 | 1000 m <sup>3</sup> /year | LN (1800,150) | The water availability potential was limited to approximately the 2045 forecasted demand for municipal water (County Administrative Board of Gotland, 2018).                                                                                                                                |
|                    | Treatment plant           | MSEK                      | LN (125,10)   | Cost estimates were based on expert judgement from Region Gotland. Useful life was set to 25 years.                                                                                                                                                                                         |
|                    | Technical components      | MSEK                      | LN (60,6)     | Cost estimates were based on expert judgement from Region Gotland. Useful life was set to 10 years.                                                                                                                                                                                         |
|                    | Membranes                 | MSEK                      | LN (60,6)     | Cost estimates were based on expert judgement from Region Gotland. Useful life was set to 5 years.                                                                                                                                                                                          |
|                    | Pipes                     | MSEK                      | LN (190,30)   | Cost estimates were based on expert judgement from Region Gotland. Useful life was set to 50 years.                                                                                                                                                                                         |
|                    | Energy costs              | SEK/m <sup>3</sup>        | LN (3,0.7)    | Cost estimates were based on expert judgement from Region Gotland.                                                                                                                                                                                                                          |

|                           |                            |                              |               |                                                                                                                                                                                                                                                                                                                                                                                         |
|---------------------------|----------------------------|------------------------------|---------------|-----------------------------------------------------------------------------------------------------------------------------------------------------------------------------------------------------------------------------------------------------------------------------------------------------------------------------------------------------------------------------------------|
| Surface water extraction  | Potential                  | 1000 m <sup>3</sup> /year    | LN (378,50)   | The water availability potential of increased surface water extraction was estimated based on expert judgement from Region Gotland.                                                                                                                                                                                                                                                     |
|                           | Technical components       | MSEK                         | LN (15,3)     | Cost estimates were based on expert judgement from Region Gotland. Useful life was set to 10 years.                                                                                                                                                                                                                                                                                     |
| Groundwater extraction    | Potential                  | 1000 m <sup>3</sup> /year    | LN (2000,400) | The water availability potential of increased groundwater extraction was estimated based on expert judgement from Region Gotland.                                                                                                                                                                                                                                                       |
|                           | Treatment plant            | MSEK                         | LN (8.25,1.2) | Existing treatment plants can be used for treating some of the groundwater. Cost estimates for new treatment plants were based on expert judgement from Region Gotland. Useful life was set to 25 years.                                                                                                                                                                                |
|                           | Technical components       | MSEK                         | LN (8.25,1)   | Cost estimates were based on expert judgement from Region Gotland. Useful life was set to 10 years.                                                                                                                                                                                                                                                                                     |
|                           | Pipes                      | SEK/m                        | LN (1000,300) | Cost estimates were based on expert judgement from Region Gotland. Useful life was set to 50 years.                                                                                                                                                                                                                                                                                     |
|                           | Groundwater wells          | MSEK                         | LN (3,0.6)    | Cost estimates were based on expert judgement from Region Gotland. Useful life was set to 50 years.                                                                                                                                                                                                                                                                                     |
| Artificial recharge       | Potential                  | 1000 m <sup>3</sup> /year    | LN (491,100)  | The water availability potential of artificial recharge at 9 existing water supplies was estimated based on GIS-analysis in combination with information from Dahlqvist et al. (2017).                                                                                                                                                                                                  |
|                           | Implementation             | MSEK                         | LN (9,1)      | Cost estimates were based on expert judgement from Region Gotland.                                                                                                                                                                                                                                                                                                                      |
|                           | Pipes                      | SEK/m                        | LN (1000,300) | Cost estimates were based on expert judgement from Region Gotland.                                                                                                                                                                                                                                                                                                                      |
| Wastewater for irrigation | Potential                  | 1000 m <sup>3</sup> /year    | LN (600,100)  | Improved wastewater treatment was assumed to be implemented in two wastewater treatment plants already connected to irrigation dams. The yearly volume treated in those plants is about 600 000 m <sup>3</sup> .                                                                                                                                                                        |
|                           | UV treatment etc           | MSEK                         | LN (5,0.8)    | Cost estimates were based on expert judgement from Region Gotland. Useful life was set to 10 years.                                                                                                                                                                                                                                                                                     |
|                           | Geotextile                 | SEK/m <sup>2</sup>           | LN (50,7)     | The 7 current irrigation dams need new geotextiles, assumed need was 5 ha per dam. Cost estimates were based on Hidås and Malm (2010).                                                                                                                                                                                                                                                  |
|                           | Waste disposal             | SEK/1000 kg                  | LN (450,50)   | About 420 000 kg sludge was assumed to have accumulated on the old geotextile. Cost estimates for waste disposal was based on expert judgement from Region Gotland.                                                                                                                                                                                                                     |
| Rainwater harvesting      | Potential                  | m <sup>3</sup> /house & year | LN (35,4)     | The average annual precipitation was assumed to be 550 mm (Region Gotland, 2017), the average roof area 100 m <sup>2</sup> , and the run-off coefficient 0.8 (Environment Agency, 2010). Water availability potential was calculated according to methods described in Abdulla and Al-Shareef (2009). The potential was then adjusted based on estimates in Herbert and Erikson (2009). |
|                           | Number of vacation houses  | # Houses                     | N (7000,800)  | Investments in rainwater harvesting systems were assumed to be carried out in all houses with private water supply. All vacation houses were here assumed to have private water supply. Gotland has about 17,200 single family resident houses (Region Gotland, 2017), of which about 40% are vacation houses (Region Gotland, 2015).                                                   |
|                           | Number of permanent houses | # Houses                     | N (8000,800)  | Investments in rainwater harvesting systems were assumed to be carried out in all single houses with private water supply. About 20,000 permanent residents on Gotland are supplied with water from their own well (County Administrative Board of Gotland, 2018). About 2.5 persons live in each house (Statistics Sweden, 2018).                                                      |

|                               |                                   |                       |                              |                                                                                                                                                                                                                                                                                                                                                                                                                                                                                                                                                                                                                                                                                                                      |
|-------------------------------|-----------------------------------|-----------------------|------------------------------|----------------------------------------------------------------------------------------------------------------------------------------------------------------------------------------------------------------------------------------------------------------------------------------------------------------------------------------------------------------------------------------------------------------------------------------------------------------------------------------------------------------------------------------------------------------------------------------------------------------------------------------------------------------------------------------------------------------------|
|                               | Installation                      | kSEK/house            | LN (34,6)                    | Cost estimates for storage tank and installation was based on expert judgement. Useful life was set to 25 years.                                                                                                                                                                                                                                                                                                                                                                                                                                                                                                                                                                                                     |
|                               | Treatment system                  | kSEK/system           | LN (12,2)                    | Cost estimates for particle separation, carbon and UV treatment systems were based on information from technique providers.                                                                                                                                                                                                                                                                                                                                                                                                                                                                                                                                                                                          |
|                               | Pump                              | SEK/house             | LN (5000,800)                | Useful life was set to 25 years.                                                                                                                                                                                                                                                                                                                                                                                                                                                                                                                                                                                                                                                                                     |
|                               | UV reinvestment                   | MSEK/every 2 years    | LN (24,2)                    | UV lamps were assumed to be replaced every other year, to a cost of 1600 SEK each.                                                                                                                                                                                                                                                                                                                                                                                                                                                                                                                                                                                                                                   |
|                               | Particle & carbon reinvestment    | MSEK/year             | LN (14,1)                    | Particle and carbon filters were assumed to be replaced every year, to a cost of 150 and 790 SEK each.                                                                                                                                                                                                                                                                                                                                                                                                                                                                                                                                                                                                               |
| Small scale desalination      | Number of vacation houses         | # Houses              | N (550,200)                  | Investment in desalination was assumed to be carried out in all single houses on Gotland's west coast within 300 meters from the Baltic sea. The number of houses was estimated based on GIS analysis. The water consumption in vacation houses was assumed to be 157 liters per person per day (Statistics Sweden, 2017).                                                                                                                                                                                                                                                                                                                                                                                           |
|                               | Vacation house usage              | person days/year      | N (180,25)                   | The utilization of vacation houses was estimated to be on an average three persons over 60 days per year (Statistics Sweden, 2017).                                                                                                                                                                                                                                                                                                                                                                                                                                                                                                                                                                                  |
|                               | Number of permanent houses        | # Houses              | N (825,300)                  | Investment in desalination was assumed to be carried out in all single houses on Gotland's west coast within 300 meters from the Baltic sea. The east coast was considered too shallow for feasible raw water intake. The number of houses was estimated based on GIS analysis. About 2.5 persons live in each house (Statistics Sweden, 2018). The water consumption in permanent houses was assumed to be 140 liters per person per day (SWWA, 2018). The total water availability potential for small scale desalination was calculated by the input variables number of houses (permanent and vacation) times the estimated annual consumption in vacation and permanent houses respectively as described above. |
|                               | Raw water intake pipes            | SEK/m                 | LN (1000,200)                | 300 meter pipes per house was assumed to be needed. Cost estimates was based on information from consultants. Useful life was set to 50 years.                                                                                                                                                                                                                                                                                                                                                                                                                                                                                                                                                                       |
|                               | Pipes on land                     | SEK/m                 | LN (400,50)                  | On average 150 meter land based pipes per house was assumed to be needed. Cost estimates was based on information from consultants. Useful life was set to 50 years.                                                                                                                                                                                                                                                                                                                                                                                                                                                                                                                                                 |
|                               | Treatment system vacation houses  | kSEK/house            | LN (97,15)                   | Cost estimates for reversed osmosis treatment systems were based on information from technique providers. Cost for annual filter change was assumed to be 1600 SEK/system. Energy consumption was assumed to 15 SEK/m <sup>3</sup> .                                                                                                                                                                                                                                                                                                                                                                                                                                                                                 |
|                               | Treatment system permanent houses | kSEK/house            | LN (137,15)                  | Cost estimates for reversed osmosis treatment systems were based on information from technique providers. Cost for annual filter change was assumed to be 2500 SEK/system. Energy consumption was assumed to 7.5 SEK/m <sup>3</sup> .                                                                                                                                                                                                                                                                                                                                                                                                                                                                                |
|                               | RO reinvestment vacation house    | kSEK/house            | LN (14,2)                    | Pump and RO membrane were assumed to make up about 15% of investment cost. They were assumed to be replaced every 10 years in vacation houses.                                                                                                                                                                                                                                                                                                                                                                                                                                                                                                                                                                       |
|                               | RO reinvestment permanent house   | kSEK/house            | LN (20,3)                    | Pump and RO membrane were assumed to make up about 15% of investment cost. They were assumed to be replaced every 7 years in permanent houses.                                                                                                                                                                                                                                                                                                                                                                                                                                                                                                                                                                       |
|                               | Vacuum toilets                    | Potential             | m <sup>3</sup> /capita & day | LN (0.3,0.01)                                                                                                                                                                                                                                                                                                                                                                                                                                                                                                                                                                                                                                                                                                        |
| Number of permanent residents |                                   | residents (thousands) | LN (25.7,2)                  | Investments in vacuum toilets were assumed to be carried out in all single houses. Gotland has about 17,200 single family resident houses (Region Gotland, 2015), of which about 60% are                                                                                                                                                                                                                                                                                                                                                                                                                                                                                                                             |

|                              |                               |                                   |               |                                                                                                                                                                                                                                                                                                                                           |
|------------------------------|-------------------------------|-----------------------------------|---------------|-------------------------------------------------------------------------------------------------------------------------------------------------------------------------------------------------------------------------------------------------------------------------------------------------------------------------------------------|
|                              |                               |                                   |               | permanet houses (Region Gotland, 2015). About 2.5 persons live in each house (Statistics Sweden, 2018).                                                                                                                                                                                                                                   |
|                              | Number of vacation houses     | # Houses                          | N (7000,800)  | Gotland has about 17,200 single family resident houses (Region Gotland, 2015), of which about 40% are vacation houses (Region Gotland, 2015).                                                                                                                                                                                             |
|                              | Vacation house usage          | person days/year                  | N (180,25)    | The utilization of vacation houses was estimated to be on an average three persons over 60 days per year (Statistics Sweden, 2017).                                                                                                                                                                                                       |
|                              | Installation vacation houses  | kSEK/house                        | LN (70,10)    | Cost estimates were based on SwAM (2016). Useful life was set to 25 years.                                                                                                                                                                                                                                                                |
|                              | Installation permanent houses | kSEK/house                        | LN (89,10)    | Cost estimates were based on SwAM (2016). Useful life was set to 25 years.                                                                                                                                                                                                                                                                |
|                              | Running costs                 | MSEK/year                         | LN (30,3)     | Annual energy costs were assumed to be 20 SEK/house, waste collection was assumed to cost 1150 SEK/collection with an average 1.5 collections per year and house (SwAM, 2016).                                                                                                                                                            |
| Greywater reuse              | Potential                     | m <sup>3</sup> /capita & day      | LN (1.2,0.01) | Estimates of produced greywater per capita and day was based on SwAM (2016).                                                                                                                                                                                                                                                              |
|                              | Number vacation houses        | # Houses                          | N (7000,800)  | Investments in greywater reuse systems were assumed to be carried out in all single houses with private water supply. All vacation houses were assumed to have private water. Gotland has about 17,200 single family resident houses (Region Gotland, 2017), of which about 40% are vacation houses (Region Gotland, 2015).               |
|                              | Vacation house usage          | Person days/year                  | N (180,25)    | The utilization of vacation houses was estimated to be on an average three persons over 60 days per year (Statistics Sweden, 2017).                                                                                                                                                                                                       |
|                              | Number permanent residents    | Residents (thousands)             | N (20,1.5)    | About 20,000 permanent residents on Gotland are supplied with water from their own well (County Administrative Board of Gotland, 2018). About 2.5 persons live in each house (Statistics Sweden, 2018).                                                                                                                                   |
|                              | Greywater system              | kSEK/system                       | LN (39,4)     | Cost estimates were based on information from technique providers. Useful life was set to 25 years.                                                                                                                                                                                                                                       |
|                              | Installation                  | kSEK/system                       | LN (10,2)     | Cost estimates were based on information from consultants.                                                                                                                                                                                                                                                                                |
|                              | Storage tank                  | kSEK/tank                         | LN (14,2)     | Cost estimates were based on information from consultants. Useful life was set to 25 years.                                                                                                                                                                                                                                               |
| Sub irrigation (large scale) | Sub irrigated area            | ha                                | N (30,6)      | Estimates of sub irrigated area were based on GIS analysis of soil layers, elevation, water courses and land use. The water availability potential was calculated as the product of the input variables subirrigated area and irrigation demand.                                                                                          |
|                              | Implementation cost           | kSEK/implementation               | LN (500,100)  | Based on the GIS analysis, 2 agricultural areas were judged as feasible for large scale sub irrigation One regulating construction per area was assumed to be needed. Cost estimates were based on expert judgement from The Federation of Swedish Farmers (LRF) on Gotland. Useful life of regulating constructions was set to 50 years. |
|                              | Permit                        | kSEK/permit                       | LN (500,60)   | Estimates were based on expert judgement from LRF Gotland.                                                                                                                                                                                                                                                                                |
|                              | Maintenance                   | SEK/regulated drain outlet & year | LN (500,100)  | Estimates were based on expert judgement from LRF Gotland.                                                                                                                                                                                                                                                                                |
|                              | Irrigation demand             | m <sup>3</sup> /year & ha         | N (1250,200)  | Estimates were based on expert judgement from LRF Gotland.                                                                                                                                                                                                                                                                                |
| Sub irrigation (small scale) | Sub irrigated area            | ha                                | N (1430,300)  | Estimates of sub irrigated area was based on GIS analysis of soil layers, elevation, water courses and land use. The water availability potential was calculated as the product of the input variables subirrigated area and irrigation demand.                                                                                           |

|                                |                         |                                   |               |                                                                                                                                                                                                                                                                                                                                                                 |
|--------------------------------|-------------------------|-----------------------------------|---------------|-----------------------------------------------------------------------------------------------------------------------------------------------------------------------------------------------------------------------------------------------------------------------------------------------------------------------------------------------------------------|
|                                | Implementation cost     | kSEK/implementation               | LN (60,10)    | Based on the GIS analysis, 28 agricultural areas were judged as feasible for small scale sub irrigation. Two regulating constructions per area was assumed to be needed. Cost estimates were based on expert judgement from LRF Gotland. Useful life of regulating constructions was set to 50 years.                                                           |
|                                | Application             | SEK/application                   | LN (1350,100) | Cost of application to the County administrative board.                                                                                                                                                                                                                                                                                                         |
|                                | Maintenance             | SEK/regulated drain outlet & year | LN (500,100)  | Estimates were based on expert judgement from LRF Gotland.                                                                                                                                                                                                                                                                                                      |
| Irrigation dams                | Irrigation demand       | m <sup>3</sup> /year & ha         | N (1250,200)  | Estimates were based on expert judgement from LRF Gotland.                                                                                                                                                                                                                                                                                                      |
|                                | Potential               | Mm <sup>3</sup> /year             | LN (5,1)      | The water availability potential was limited to the 2045 forecasted demand for irrigation water (County Administrative Board of Gotland, 2018).                                                                                                                                                                                                                 |
|                                | Excavation cost         | SEK/m <sup>3</sup>                | LN (25,4)     | Estimates were based on Hidås and Malm (2010) and expert judgement from LRF Gotland. To cover losses from evaporation, the total dam volume needed was increased with 20%. Excavation material was assumed to amount to 2/3 of dam volume. The average dam volume was assumed to be 70,000 m <sup>3</sup> . Useful life of irrigation dams was set to 40 years. |
|                                | Consulting cost         | kSEK/dam                          | LN (40,10)    | Estimates were based on Hidås and Malm (2010).                                                                                                                                                                                                                                                                                                                  |
|                                | Irrigation assets       | kSEK/asset                        | LN (700,100)  | Estimates of pumps, machines and pipes were based on (SMHI, 2017). Useful life 10 years.                                                                                                                                                                                                                                                                        |
|                                | Agricultural land value | kSEK/ha                           | LN (113,20)   | Irrigation dams are often placed on arable land. Estimates of reduced land value was based on price statistics for arable land on Gotland for 2017 (Helin, 2018).                                                                                                                                                                                               |
|                                | Irrigation cost         | SEK/ha                            | LN (360,50)   | Estimates were based on Hansson (2012). The average land was assumed to be irrigated five times per year.                                                                                                                                                                                                                                                       |
| Ramp irrigation                | Potential               | 1000 m <sup>3</sup> /year         | LN (625,100)  | Water efficiency was assumed to increase from 70 to 82.5% when switching from traditional to ramp irrigation techniques on the current irrigated land. Estimates were based on Rosenqvist (2006).                                                                                                                                                               |
|                                | Investment              | kSEK/machine                      | LN (210,40)   | Estimates were based on Rosenqvist (2006). Useful life 10 years.                                                                                                                                                                                                                                                                                                |
|                                | Maintenance             | kSEK/machine & year               | LN (4, 0.5)   | Increased maintenance cost estimates were based on Rosenqvist (2006).                                                                                                                                                                                                                                                                                           |
|                                | Moving cost             | SEK/ha & year                     | LN (568,50)   | Increased moving cost estimates were based on Rosenqvist (2006).                                                                                                                                                                                                                                                                                                |
|                                | Irrigation demand       | m <sup>3</sup> /year & ha         | N (1250,200)  | Estimates were based on expert judgement from LRF Gotland.                                                                                                                                                                                                                                                                                                      |
| Reuse of mining drainage water | Potential               | 1000 m <sup>3</sup> /year         | LN (700,100)  | Water availability potential was limited to the approximate amount of good quality drainage water currently being transported from one of the mines to the Baltic sea.                                                                                                                                                                                          |
|                                | Treatment plant         | MSEK                              | LN (25,3)     | Cost estimates were based on expert judgement from Region Gotland. Useful life was set to 25 years.                                                                                                                                                                                                                                                             |
|                                | Membrane                | MSEK                              | LN (12,1)     | Cost estimates were based on expert judgement from Region Gotland. Useful life was set to 7 years.                                                                                                                                                                                                                                                              |
|                                | Technical components    | MSEK                              | LN (12,1)     | Cost estimates were based on expert judgement from Region Gotland. Useful life was set to 10 years.                                                                                                                                                                                                                                                             |
|                                | Pipes                   | MSEK                              | LN (1,0.2)    | About 1000 meter raw water pipes was assumed needed. Cost estimates were based on expert judgement from Region Gotland. Useful life was set to 50 years.                                                                                                                                                                                                        |
|                                | Operating costs         | MSEK/year                         | LN (2.4,0.2)  | Operating costs were assumed to be about the same as regular surface water treatment, approximated to 3.5 SEK/m <sup>3</sup> based on VASS (2015).                                                                                                                                                                                                              |

|                                          |                      |                             |               |                                                                                                                                                                                                                                                                                                                                                                                                                                 |
|------------------------------------------|----------------------|-----------------------------|---------------|---------------------------------------------------------------------------------------------------------------------------------------------------------------------------------------------------------------------------------------------------------------------------------------------------------------------------------------------------------------------------------------------------------------------------------|
| Saltwater pools and toilets at campsites | Potential pools      | m <sup>3</sup> /campsite    | LN (1000,150) | Gotland has 16 campsites, of which half are assumed to have pools. Water availability potential was based on from one of the local campsites.                                                                                                                                                                                                                                                                                   |
|                                          | Installation pools   | kSEK/campsite               | LN (227,40)   | Cost estimates was based on from one of the local campsites. Useful life was set to 25 years.                                                                                                                                                                                                                                                                                                                                   |
|                                          | Potential toilets    | m <sup>3</sup> /campsite    | LN (1400,200) | Water availability potential was based on from one of the local campsites.                                                                                                                                                                                                                                                                                                                                                      |
|                                          | Installation toilets | kSEK/campsite               | LN (264,40)   | Cost estimates was based on from one of the local campsites. Useful life was set to 25 years.                                                                                                                                                                                                                                                                                                                                   |
| Retrofit showers and taps at hotels      | Potential            | m <sup>3</sup> /room & year | LN (9,1)      | Investments in water saving showerheads and taps were assumed to be carried out in all hotels on Gotland. There are in total 1,846 hotel rooms on Gotland (Statistics Sweden, 2018). The hotels connected to The Nordic Swan Ecolabel, with in total 469 hotel rooms, was excluded as they already had installed water saving devices. Water availability potential was based on water savings made in one of the local hotels. |
|                                          | Installation         | SEK/room                    | LN (363,50)   | Cost estimates were based on information from one of the local hotels. Useful life was set to 25 years.                                                                                                                                                                                                                                                                                                                         |
|                                          | Energy saving        | SEK/room & year             | LN (1200,150) | Energy saving estimates were based on information from one of the local hotels.                                                                                                                                                                                                                                                                                                                                                 |

## References

- Abdulla, F., A. , & Al-Shareef, A., W. (2009). Roof rainwater harvesting systems for household water supply in Jordan. *Desalination*, 243, 195-207. doi:10.1016/j.desal.200
- County Administrative Board of Gotland. (2018). *Regional Water Supply Plan of Gotland*.
- Dahlqvist, P., Thorsbrink, M., Holgersson, B., Nisell, J., Maxe, L., & Gustafsson, M. (2017). *Wetlands and groundwater - the possibility of increased groundwater capacity on Gotland (Våtmarker och grundvattenbildning – om möjligheten till ökad kapacitet vid grundvattentäkter på Gotland)*: SGU-rapport 2017:01. Swedish Geological Survey.
- Environment Agency. (2010). *Harvesting rainwater for domestic uses: an information guide*. <https://webarchive.nationalarchives.gov.uk/20140329083319/http://cdn.environment-agency.gov.uk/geho1110bten-e-e.pdf>.
- Hansson, P. (2012). *Water limits Swedish crops (Vatten begränsar svenska skördar)* (Vol. 04). file:///C:/Users/karsjos/Downloads/Vatten%20begr%C3%A4nsar%20svenska%20sk%C3%B6rdar%20Arvensis%202012-2%20(1).pdf: Arvensis.
- Helin, M. (2018). *Agricultural land prices 2017 (Åkermarkspriser helår 2017)*. <https://www.lrfkonsult.se/Global/%C3%85kermarkspriser/Hel%C3%A5r%202017/%C3%85kermarkspriser%20hel%C3%A5r%202017.pdf>: LRF Konsult.
- Herbert, R. G., & Erikson, U. (2009). Rainwater collection from a roof on southern Gotland, Sweden. *Vatten*, 65, 225–230.
- Hidås, U., & Malm, P. (2010). *Irrigation Dams. Help with planning, contact with authorities and construction (Bevattningsdammar. Hjälp med planering, myndighetskontakt och konstruktion)*: LRF.

- Lambert, A. O., Brown, T. G., Takizawa, M., & Weimer, D. (1999). A review of performance indicators for real losses from water supply systems. *Journal of Water Supply: Research and Technology*, 48(6), 227-237.
- Malm, A., Moberg, F., Rosén, L., & Pettersson, T. J. R. (2015). Cost-Benefit Analysis and Uncertainty Analysis of Water Loss Reduction Measures: Case Study of the Gothenburg Drinking Water Distribution System. *Water Resources Management*, 29(15), 5451-5468. doi:10.1007/s11269-015-1128-2
- Region Gotland. (2015). *Gotland in numbers (Gotland i siffror)*. <http://gotland.com/content/uploads/2016/09/GIS2014.pdf>.
- Region Gotland. (2017). *Gotland in numbers (Gotland i siffror)*. <https://www.gotland.se/64224>.
- Rosenqvist, H. (2006). *Economy in potato and vegetable cultivation (Miljöekonomi i potatis- och grönsaksodling)*: Greppa Näringen.
- SMHI. (2017). *Irrigation dams on Gotland (Bevattningsdamm för jordbruk, fördjupning Gotland)*. <https://www.smhi.se/klimat/klimatanpassa-samhallet/exempel-pa-klimatanpassning/bevattningsdamm-for-jordbruk-fordjupning-gotland-1.118564>: Swedish Meteorological and Hydrological Institute.
- Statistics Sweden. (2017). *Water Use in Sweden 2015*.
- Statistics Sweden. (2018). *Number of rooms, cottages and beds by type of accommodation and year (Antal rum, stugor och bäddar efter övernattningsstyp och år)*: Statistics Sweden.
- SwAM. (2016). *The Swedish Agency for Marine and Water Management's general advice on small sewage systems for household wastewater (Havs- och vattenmyndighetens allmänna råd om små avloppsanordningar för hushållspillvatten)*: HVMFS 2016:17. The Swedish Agency for Marine and Water Management.
- SWWA. (2018). *Drinking Water Facts (Dricksvattenfakta)*. <http://www.svensktvatten.se/fakta-om-vatten/dricksvattenfakta/>: Swedish Water and Wastewater Association.
- VASS. (2015). *Swedish Water and Wastewater Associations Statistics System*.
- VASS. (2018). *Swedish Water and Wastewater Associations Statistics System*.
