# Supplementary material for: Marginal Abatement Cost Curves for Water Scarcity Mitigation under Uncertainty
Source: Springer Nature journal article supplement (doi:10.1007/s11269-019-02376-8), 2019-09-01
Supplement: MOESM4 [file 17338850]

## Marginal abatement cost curves for water scarcity mitigation under uncertainty

Karin Sjöstrand<sup>1,2,\*</sup>, Andreas Lindhe<sup>2</sup>, Tore Söderqvist<sup>3</sup>, Peter Dahlqvist<sup>4</sup>, Lars Rosén<sup>2</sup>

<sup>1</sup>RISE Research Institutes of Sweden, Scheelevägen 27, SE- 223 70 Lund, Sweden.

\*Corresponding author, [karin.sjostrand@ri.se](mailto:karin.sjostrand@ri.se), +15512409909

<sup>2</sup>Chalmers University of Technology, Department of Architecture and Civil Engineering, SE-412 96 Göteborg, Sweden

<sup>3</sup>Anthesis Enveco, Barnhusgatan 4, SE-111 23 Stockholm, Sweden

<sup>4</sup>Geological Survey of Sweden, Kiliansgatan 10, SE-223 50 Lund, Sweden

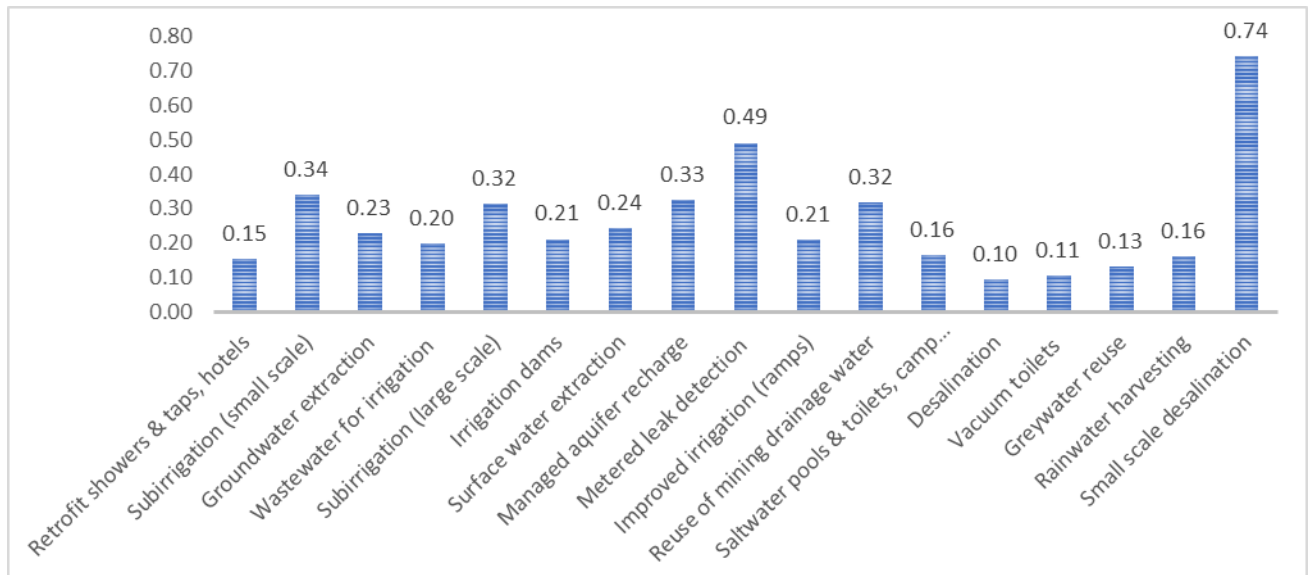

**Fig 1** Coefficient of variation for all analyzed measures
