# Supplementary material for: Marginal Abatement Cost Curves for Water Scarcity Mitigation under Uncertainty
Source: Springer Nature journal article supplement (doi:10.1007/s11269-019-02376-8), 2019-09-01
Supplement: MOESM5 [file 17338850]

## Marginal abatement cost curves for water scarcity mitigation under uncertainty

Karin Sjöstrand<sup>1,2,\*</sup>, Andreas Lindhe<sup>2</sup>, Tore Söderqvist<sup>3</sup>, Peter Dahlgvist<sup>4</sup>, Lars Rosén<sup>2</sup>

<sup>1</sup>RISE Research Institutes of Sweden, Scheelevägen 27, SE- 223 70 Lund, Sweden.

\*Corresponding author, email: karin.sjostrand@ri.se

<sup>2</sup>Chalmers University of Technology, Department of Architecture and Civil Engineering, SE-412 96 Göteborg, Sweden

<sup>3</sup>Anthesis Enveco, Barnhusgatan 4, SE-111 23 Stockholm, Sweden

<sup>4</sup>Geological Survey of Sweden, Kiliansgatan 10, SE-223 50 Lund, Sweden

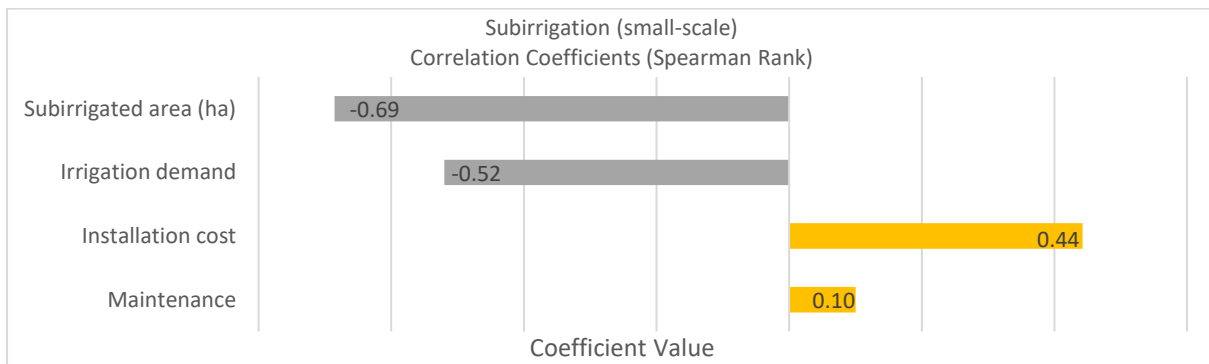

**Fig. 1** Correlation coefficients (Spearman rank) of input variables and the cost per unit outcome for small-scale sub irrigation at 3.5% discount rate

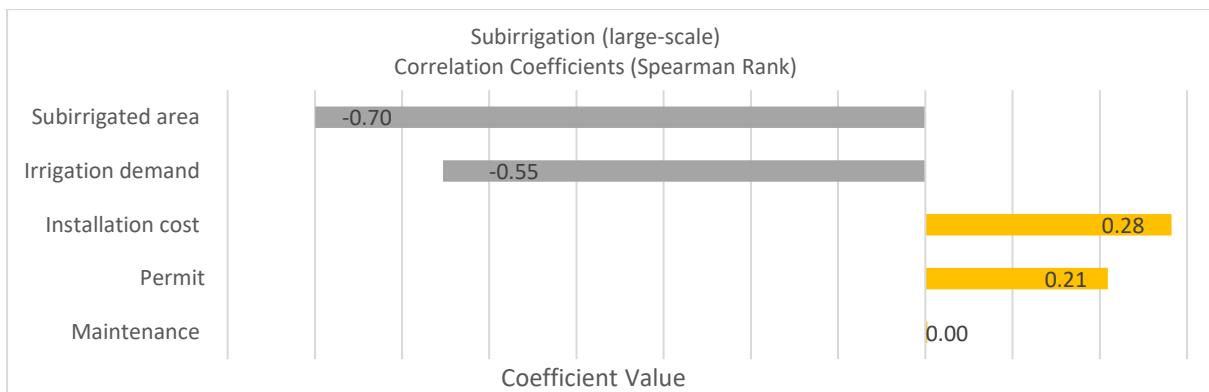

**Fig. 2** Correlation coefficients (Spearman rank) of input variables and the cost per unit outcome for large-scale sub irrigation at 3.5% discount rate

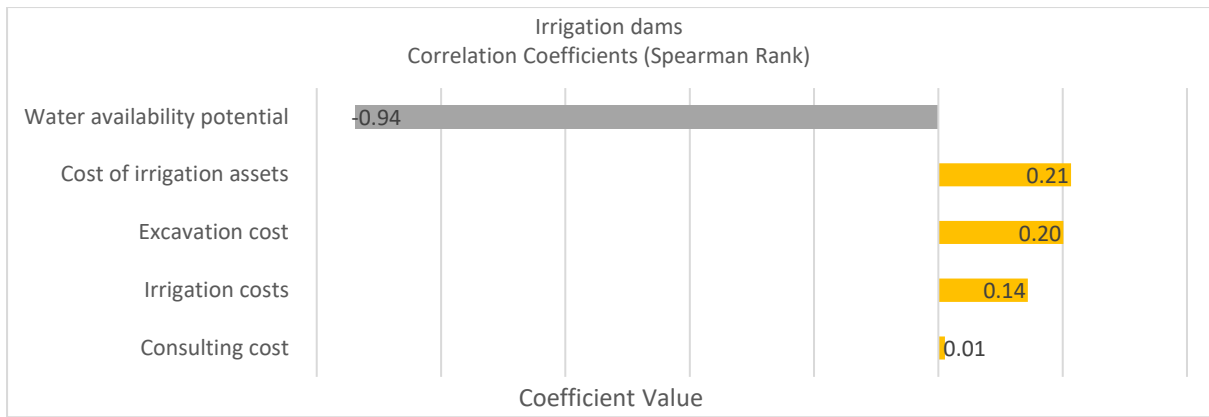

**Fig. 3** Correlation coefficients (Spearman rank) of input variables and the cost per unit outcome for irrigation dams at 3.5% discount rate

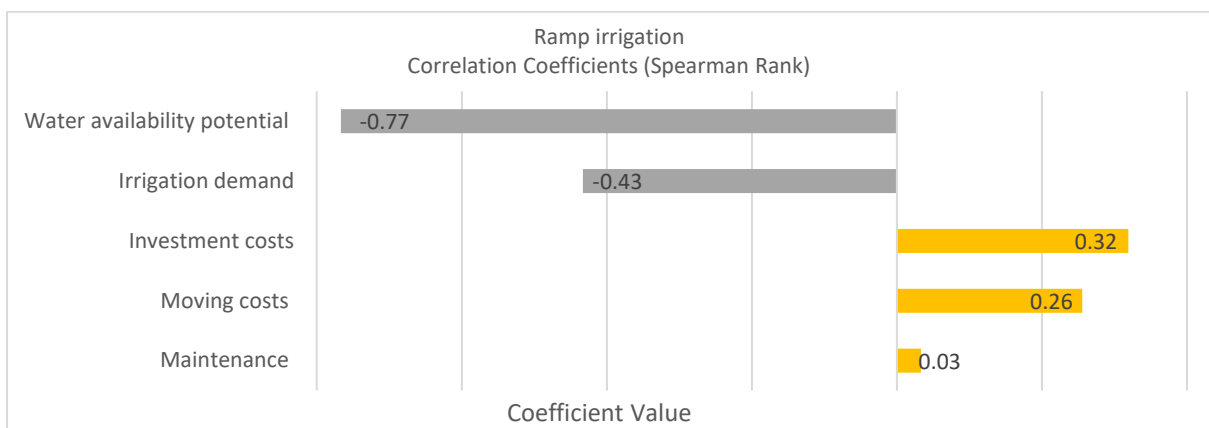

**Fig. 4** Correlation coefficients (Spearman rank) of input variables and the cost per unit outcome for ramp irrigation at 3.5% discount rate

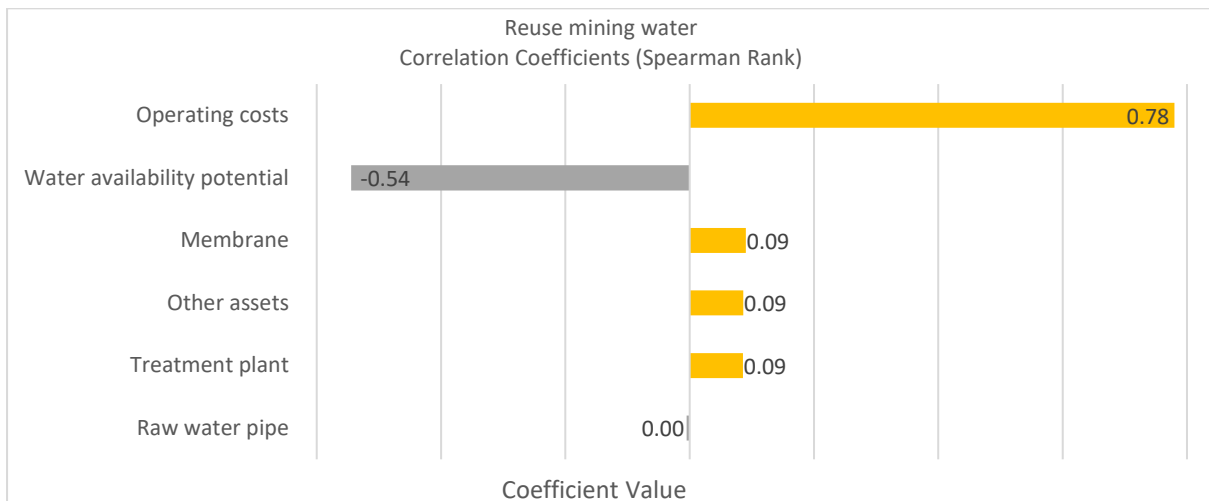

**Fig. 5** Correlation coefficients (Spearman rank) of input variables and the cost per unit outcome for reuse of mining drainage water at 3.5% discount rate

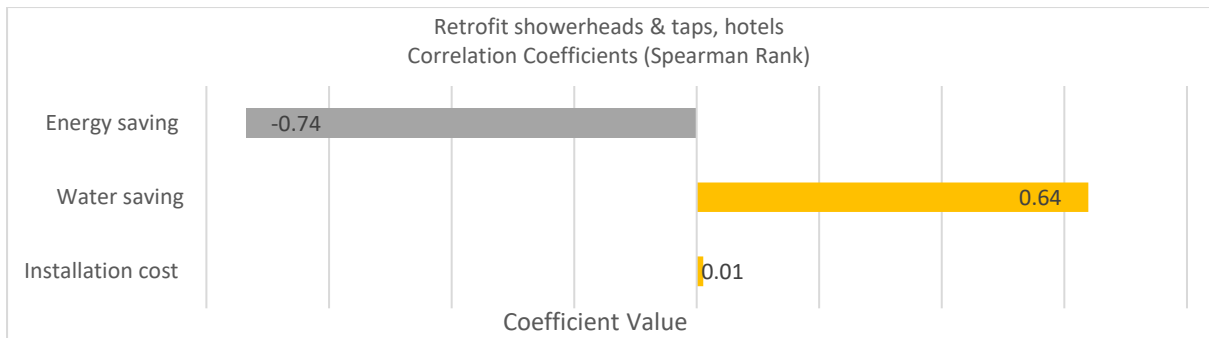

**Fig. 6** Correlation coefficients (Spearman rank) of input variables and the cost per unit outcome for retrofitting showerheads and taps at hotels at 3.5% discount rate

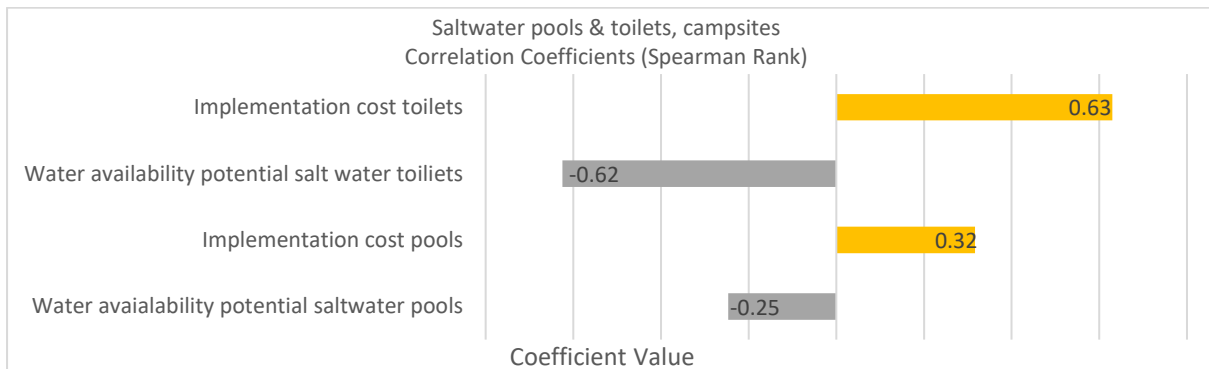

**Fig. 7** Correlation coefficients (Spearman rank) of input variables and the cost per unit outcome for saltwater pools and toilets at campsites at 3.5% discount rate

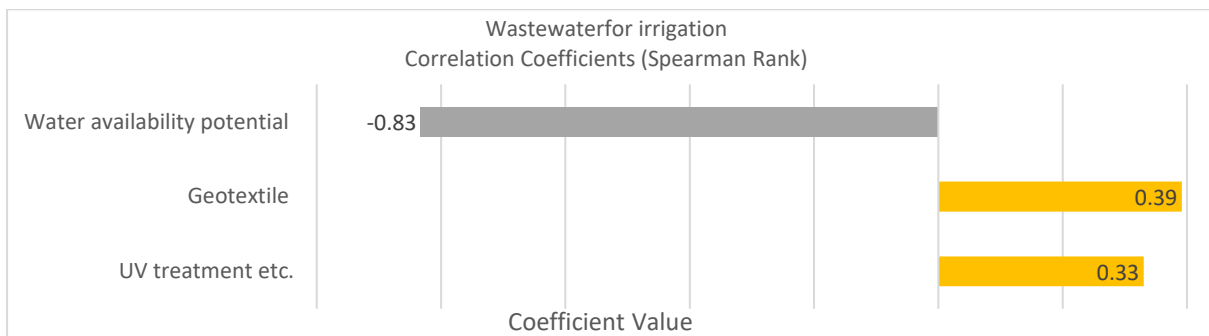

**Fig. 8** Correlation coefficients (Spearman rank) of input variables and the cost per unit outcome for wastewater for irrigation at 3.5% discount rate

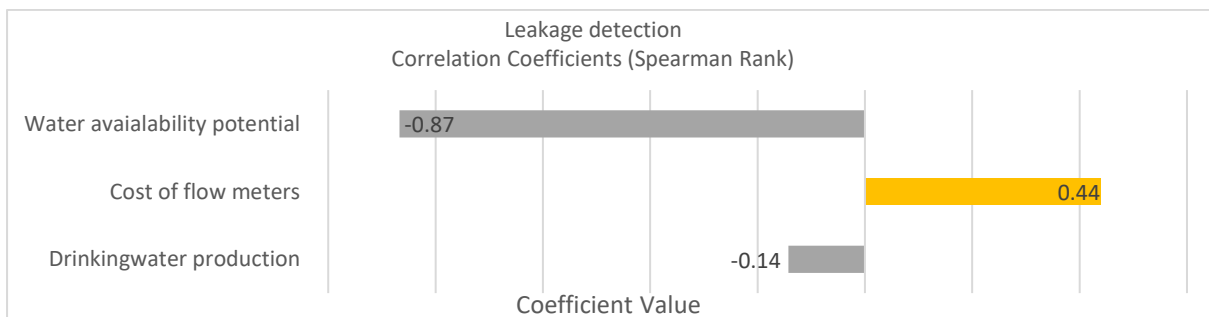

**Fig. 9** Correlation coefficients (Spearman rank) of input variables and the cost per unit outcome for leakage detection at 3.5% discount rate

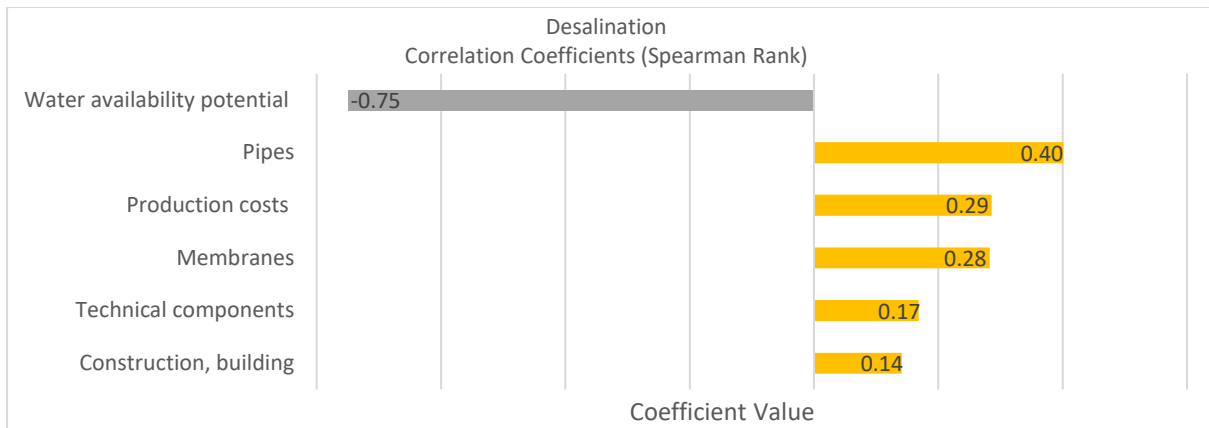

**Fig. 10** Correlation coefficients (Spearman rank) of input variables and the cost per unit outcome for desalination at 3.5% discount rate

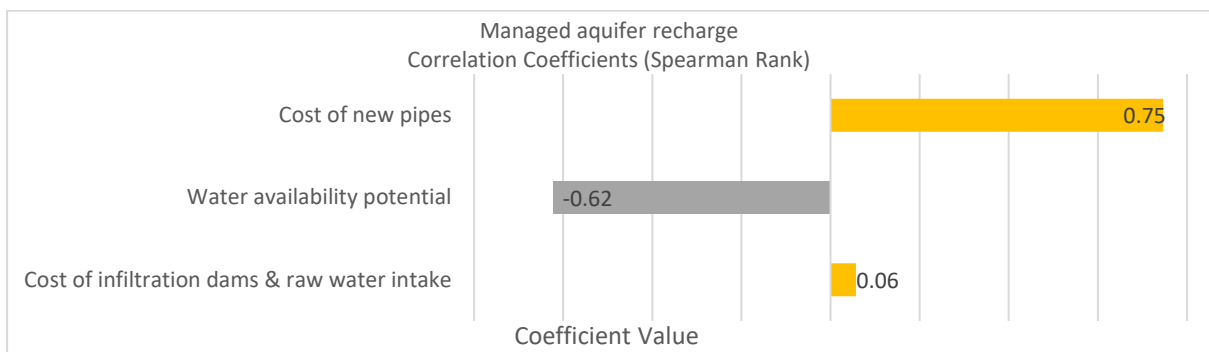

**Fig. 11** Correlation coefficients (Spearman rank) of input variables and the cost per unit outcome for managed aquifer recharge at 3.5% discount rate

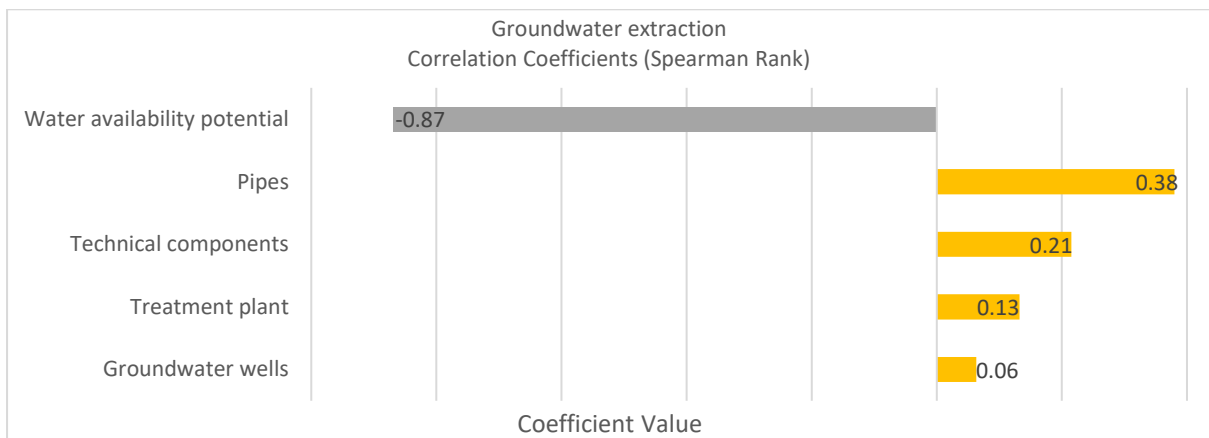

**Fig. 12** Correlation coefficients (Spearman rank) of input variables and the cost per unit outcome for increased groundwater extraction at 3.5% discount rate

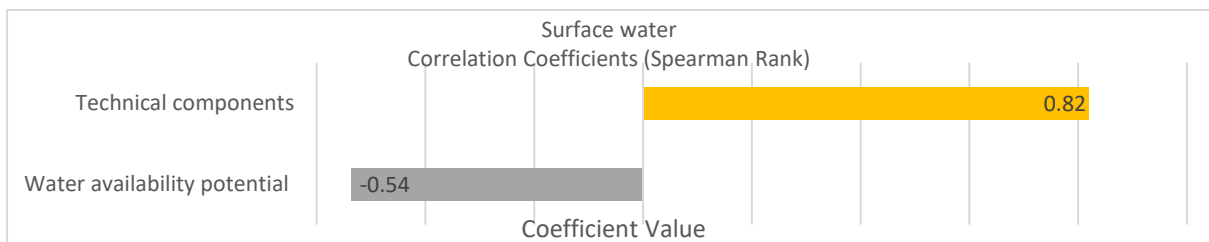

**Fig. 13** Correlation coefficients (Spearman rank) of input variables and the cost per unit outcome for increased surface water extraction at 3.5% discount rate

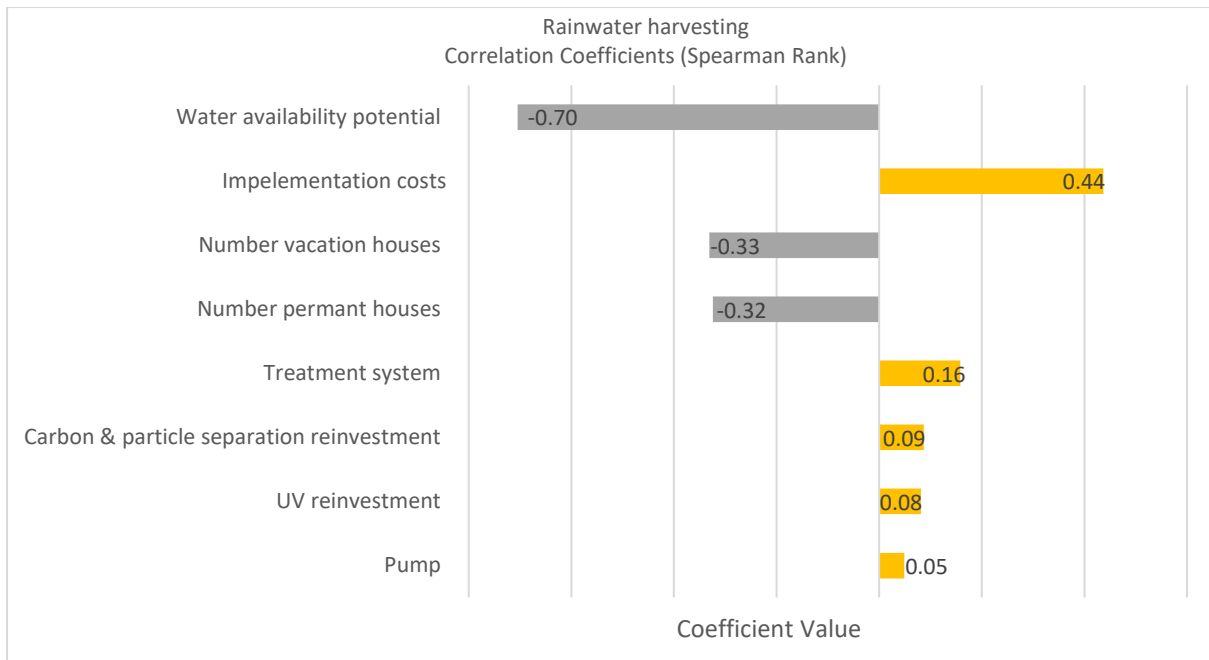

**Fig. 14** Correlation coefficients (Spearman rank) of input variables and the cost per unit outcome for rainwater harvesting at 3.5% discount rate

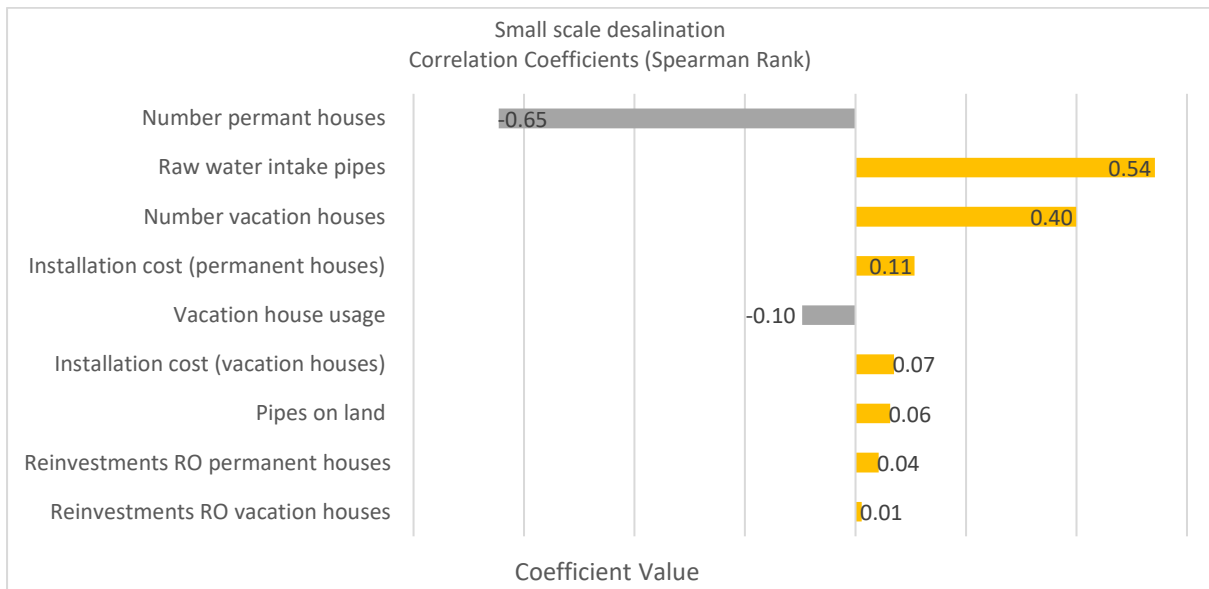

**Fig. 15** Correlation coefficients (Spearman rank) of input variables and the cost per unit outcome for small scale desalination at 3.5% discount rate

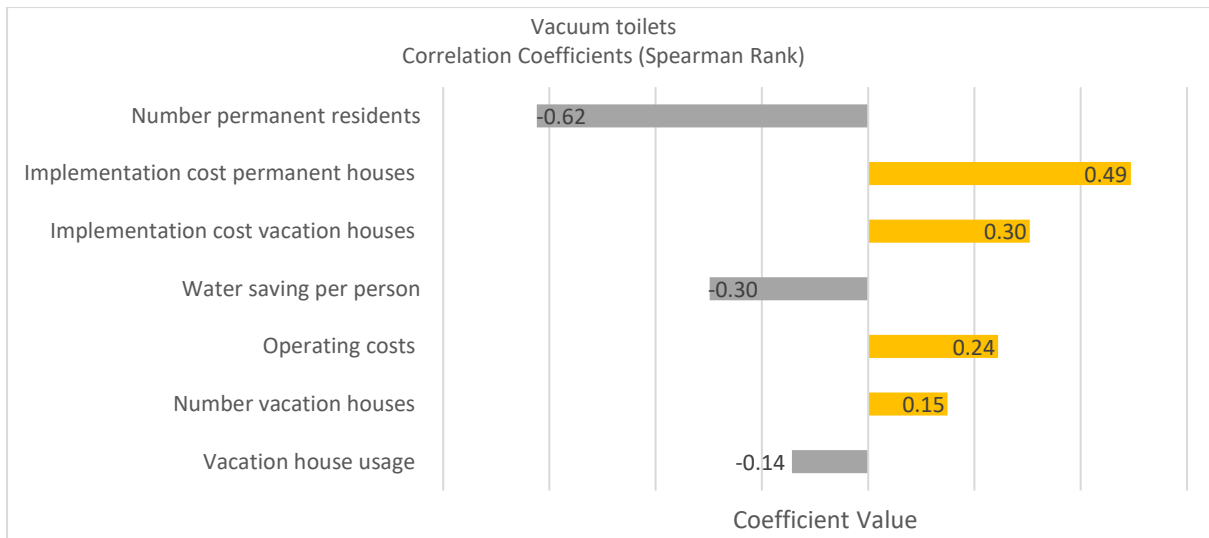

**Fig. 16** Correlation coefficients (Spearman rank) of input variables and the cost per unit outcome for vacuum toilets at 3.5% discount rate

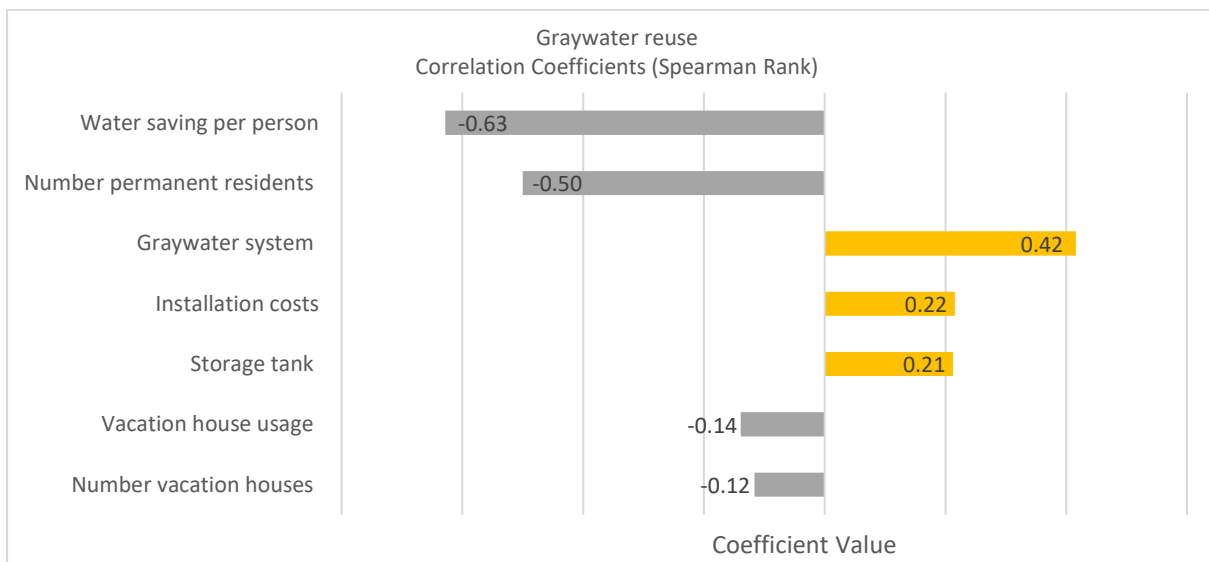

**Fig. 17** Correlation coefficients (Spearman rank) of input variables and the cost per unit outcome for graywater reuse at 3.5% discount rate
