# Supplementary material for: Marginal Abatement Cost Curves for Water Scarcity Mitigation under Uncertainty
Source: Springer Nature journal article supplement (doi:10.1007/s11269-019-02376-8), 2019-09-01
Supplement: MOESM6 [file 17338850]

## Marginal abatement cost curves for water scarcity mitigation under uncertainty

Karin Sjöstrand<sup>1,2,\*</sup>, Andreas Lindhe<sup>2</sup>, Tore Söderqvist<sup>3</sup>, Peter Dahlgvist<sup>4</sup>, Lars Rosén<sup>2</sup>

<sup>1</sup>RISE Research Institutes of Sweden, Scheelevägen 27, SE- 223 70 Lund, Sweden.

\*Corresponding author, email: karin.sjostrand@ri.se

<sup>2</sup>Chalmers University of Technology, Department of Architecture and Civil Engineering, SE-412 96 Göteborg, Sweden

<sup>3</sup>Anthesis Enveco, Barnhusgatan 4, SE-111 23 Stockholm, Sweden

<sup>4</sup>Geological Survey of Sweden, Kiliansgatan 10, SE-223 50 Lund, Sweden

**Table 1** Order of cost-effectiveness with different discount rates.

| Mitigation measure                   | 1.4% | 3.5% | 5% |
|--------------------------------------|------|------|----|
| Retrofit showers & taps, hotels      | 1    | 1    | 1  |
| Sub irrigation (small-scale)         | 2    | 2    | 2  |
| Groundwater extraction               | 3    | 3    | 3  |
| Wastewater for irrigation            | 4    | 4    | 4  |
| Sub irrigation (large-scale)         | 5    | 5    | 5  |
| Irrigation dams                      | 6    | 6    | 6  |
| Artificial recharge                  | 7    | 8    | 9  |
| Leakage detection                    | 8    | 9    | 8  |
| Surface water extraction             | 9    | 7    | 7  |
| Ramp irrigation                      | 10   | 10   | 10 |
| Saltwater pools & toilets, campsites | 11   | 12   | 12 |
| Reuse of mining water                | 12   | 11   | 11 |
| Desalination                         | 13   | 13   | 13 |
| Vacuum toilets                       | 14   | 14   | 14 |
| Greywater reuse                      | 15   | 15   | 15 |
| Rainwater harvesting                 | 16   | 16   | 16 |
| Small scale desalination             | 17   | 17   | 17 |
